# Supplementary material for: LAPONITE® nano-silicates potentiate the angiogenic effects of FG-4592 and osteogenic effects of BMP-2
Source: Royal Society of Chemistry journal article supplement (doi:10.1039/d4bm00636d), 2024-01-01
Supplement: d4bm00636d1.pdf [file d4bm00636d1.pdf]

Laponite nano-silicates potentiate the angiogenic effects of FG-4592 and  
osteogenic effects of BMP-2

*Bipin Gaihre, Emily Camilleri, Maryam Tilton, Maria D. Astudillo Potes, Xifeng Liu, Fabrice  
Lucien, Lichun Lu\**

Bipin Gaihre, Emily Camilleri, Maryam Tilton, Maria D. Astudillo Potes, Xifeng Liu, Lichun Lu  
Department of Physiology and Biomedical Engineering, Mayo Clinic, Rochester, MN, 55905,  
USA

Department of Orthopedic Surgery, Mayo Clinic, Rochester, MN, 55905, USA

Email: [lu.lichun@mayo.edu](mailto:lu.lichun@mayo.edu)

Fabrice Lucien

Department of Urology, Mayo Clinic, Rochester, MN, 55905, USA

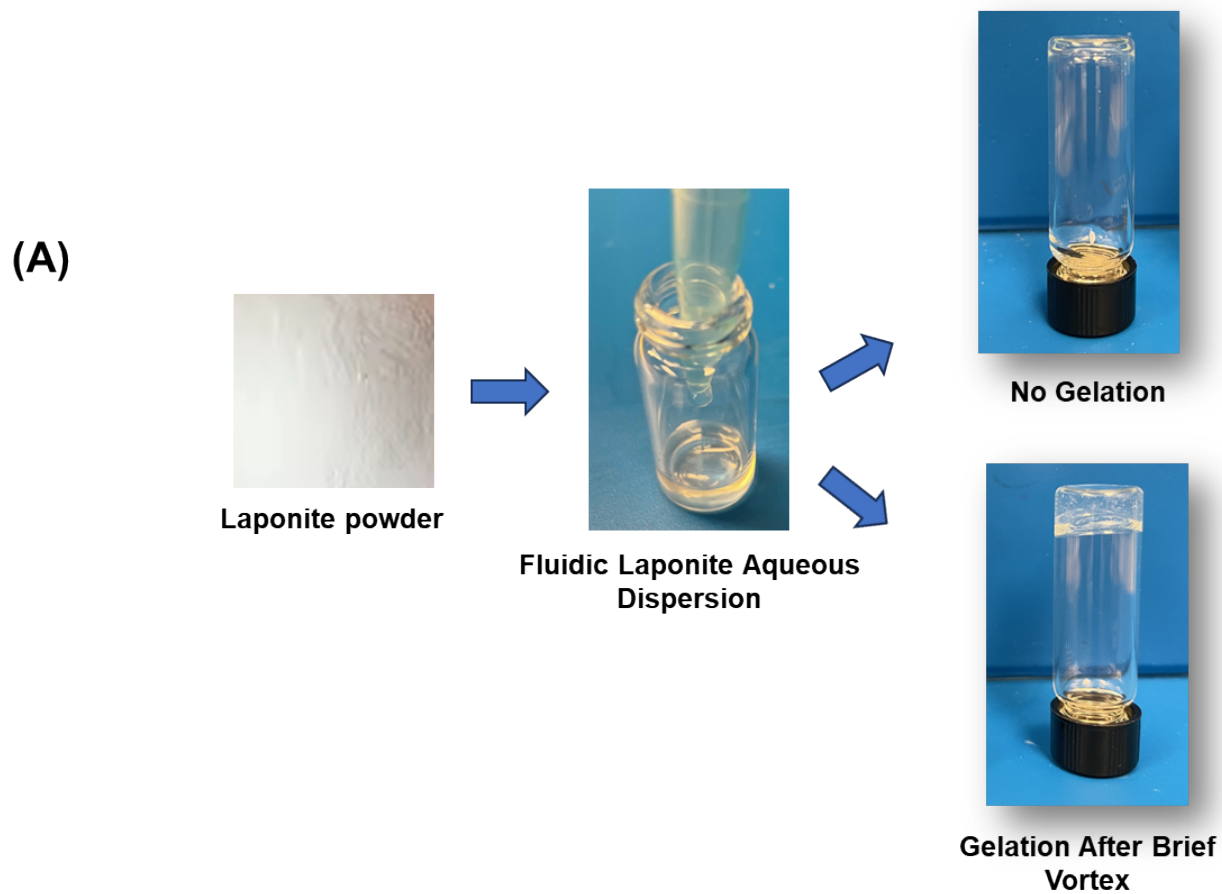

(B)

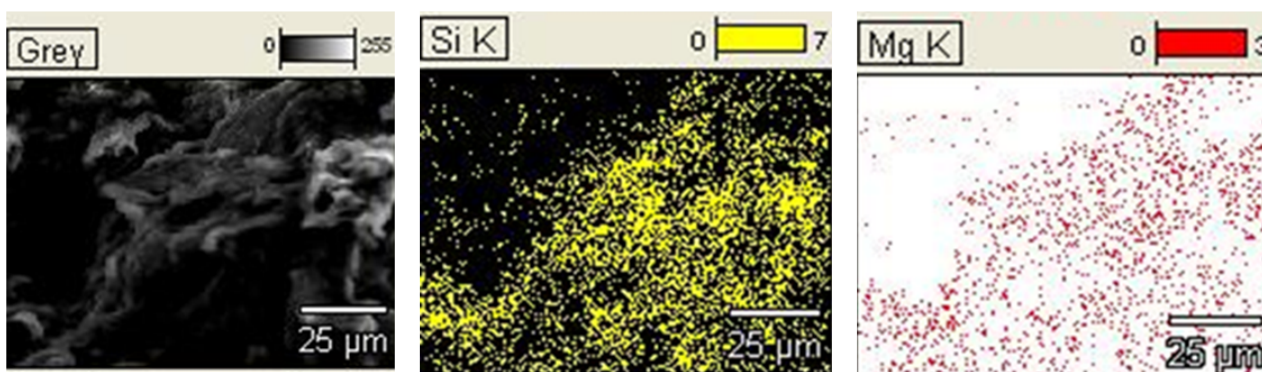

**Figure S1:** (A) Fabrication of Laponite gel. (B) Representative EDX mapping of Laponite showing Silicon (Si) and Magnesium (Mg).

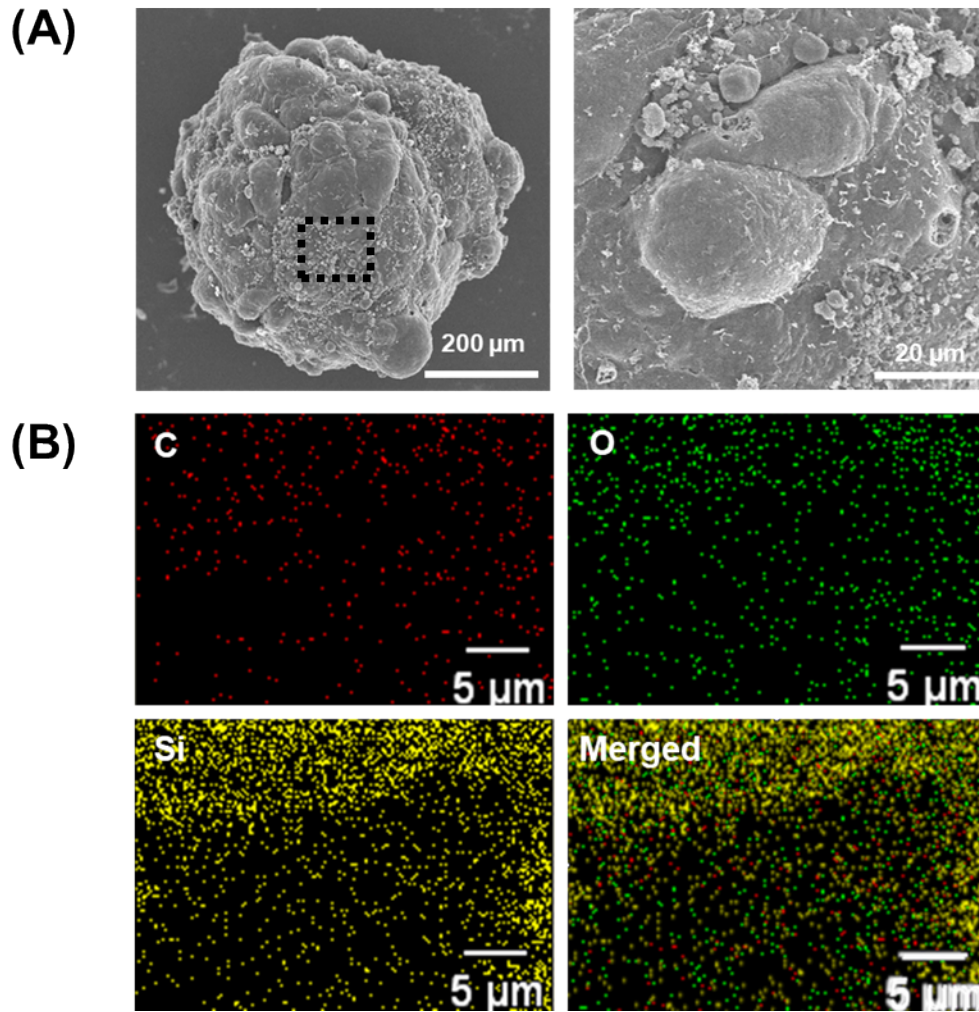

**Figure S2:** (A) Representative SEM images of HUVECs 3D spheroid. (B) Representative EDX mapping of Silicon (Si) from dotted rectangle region to demonstrate the incorporation of Laponite to the 3D spheroids for LAP containing groups.

| Gene           | Forward sequence          | Reverse sequence        |
|----------------|---------------------------|-------------------------|
| VEGF           | GGAGGGCAGAATCATCACGA      | GCTCATCTCTCCTATGTGCTGG  |
| HIF-1 $\alpha$ | TGATTGCATCTCCATCTCCTACC   | GACTCAAAGCGACAGATAACACG |
| GAPDH          | AGAAAAACCTGCCAAATATGATGAC | TGGGTGTCGCTGTTGAAGTC    |
| ALP            | ACTGGTACTCAGACAACGAGAT    | ACGTCAATGTCCCTGATGTTATG |
| SPARC          | GCGAGTTTGAGAAGGTGTGC      | TTTGCAAGGCCCGATGTAGT    |
| BGLAP          | GGCGCTACCTGTATCAATGG      | GTGGTCAGCCAACCTCGTCA    |
| YWHAZ          | TGCTCACAAGCAGAGAGCA       | TGTGACTGATCGACAATCCCTTT |

**Table S1:** Primer sequences used for RT-PCR analysis of mRNA expression.
